# Supplementary material
Source: PubMed Central journal article supplement (PMC11029037)
Supplement: 262_2012_1300_MOESM1_ESM.pdf [file 262_2012_1300_MOESM1_ESM.pdf]

**Table S1**

List of genes specifically upregulated in T cells of patients with CLL (n=107)

| Gene Symbol                 | Gene Name                                              | Fold increase | Description/Function(s)                                                                                                                                        | Probe set ID |
|-----------------------------|--------------------------------------------------------|---------------|----------------------------------------------------------------------------------------------------------------------------------------------------------------|--------------|
| <b>Receptors</b>            |                                                        |               |                                                                                                                                                                |              |
| CX3CR1                      | Chemokine (C-X3-C motif) receptor 1                    | 8             | chemotaxis, cell adhesion, G-protein coupled receptor                                                                                                          | 205898_at    |
| CRTAM                       | Class-I MHC-restricted T cell associated molecule      | 3.7           | CD8 and NKT cell receptor, cell/cell interaction, NCL2 is the ligand.                                                                                          | 206914_at    |
| TCRGV9                      | T cell receptor gamma locus variable 9                 | 3.1           | antigen recognition by T cell                                                                                                                                  | 211144_x_at  |
| GPR171                      | G protein-coupled receptor 171                         | 3             | G-protein coupled receptor                                                                                                                                     | 207651_at    |
| KLRD1(CD94)                 | Killer cell lectin-like receptor subfamily D, member 1 | 3             | The dimmer CD94/NKG2 exist on NK and a small subset of CD8 T cells. This receptor varies in function as an inhibitor or activator depending on isoform of NKG2 | 210606_x_at  |
| KLRG1, MAFA                 | Killer cell lectin-like receptor subfamily G, member 1 | 2.8           | cellular defense response, signaling                                                                                                                           | 210288_at    |
| KLRC3, NKG2C                | Killer cell lectin-like receptor subfamily C, member 3 | 2.5           | activating receptor with CD94                                                                                                                                  | 206785_s_at  |
| KLRA1, LY49L                | Killer cell lectin-like receptor subfamily A, member 1 | 2.4           | signaling, cellular defense                                                                                                                                    | 207229_at    |
| KLRC4, NKG2F                | Killer cell lectin-like receptor subfamily C, member 4 | 2.2           | signaling, cellular defense                                                                                                                                    | 210690_at    |
| LY9, SLAMF3                 | leukocyte cell surface receptor                        | 2.7           | cell adhesion, humoral defense mechanism                                                                                                                       | 215967_s_at  |
| CYSLTR1                     | G-protein coupled receptor protein signaling pathway   | 2.7           | G-protein coupled receptor                                                                                                                                     | 216288_at    |
| TCRD@                       | T cell receptor delta locus                            | 2.6           | Ag recognition by T cell                                                                                                                                       | 216191_s_at  |
| DP                          | Prostaglandin D2 receptor                              | 2.4           | G-protein coupled, signaling pathway                                                                                                                           | 215894_at    |
| TGFBR3                      | TGF-beta receptor III                                  | 2.4           | TGFbeta signaling pathway, proliferation                                                                                                                       | 204731_at    |
| HCP5                        | HLA complex P5                                         | 2.3           | defense response                                                                                                                                               | 206082_at    |
| CD122                       | IL-2 receptor, beta                                    | 2.2           | part of IL-2 receptor, differentiation and activation of T cells                                                                                               | 205291_at    |
| IL12RB2                     | IL-12 receptor, beta 2                                 | 2.2           | IL-12 receptor, positive regulation of cell proliferation                                                                                                      | 206999_at    |
| PROCR, EPCR                 | Endothelial protein C receptor                         | 2.2           | inflammatory response, blood coagulation                                                                                                                       | 203650_at    |
| FHC, LDLR                   | Low density lipoprotein receptor                       | 2.1           | lipid metabolism and transport                                                                                                                                 | 202068_s_at  |
| TLR3                        | Toll-like receptor 3                                   | 2.1           | cause expression of co-receptor when activated                                                                                                                 | 206271_at    |
| <b>TNF family</b>           |                                                        |               |                                                                                                                                                                |              |
| LTA, TNFSF1                 | Lymphotoxin alpha (TNF superfamily, member 1)          | 3.4           | induction of apoptosis, cytokine activity                                                                                                                      | 206975_at    |
| CD154, CD40L                | T cell-B cell activating molecule                      | 3.1           | growth factor for T and B cells                                                                                                                                | 207892_at    |
| CD137, TNFRSF9              | TNF receptor superfamily, member 9                     | 2.7           | prevention of activation-induced death of T cells                                                                                                              | 211786_at    |
| TNFSF6, FasL                | TNF superfamily (ligand), member 6                     | 2.7           | apoptosis                                                                                                                                                      | 211333_s_at  |
| Fas(CD95)                   | Fas antigen                                            | 2.2           | apoptosis                                                                                                                                                      | 204780_s_at  |
| TRAF1                       | TNF-receptor associated factor 1                       | 2.0           | anti-apoptotic agent                                                                                                                                           | 205599_at    |
| <b>Cytokines/Chemokines</b> |                                                        |               |                                                                                                                                                                |              |
| XCL2                        | Chemokine (C motif) ligand 2                           | 29            | lymphocyte chemotaxis                                                                                                                                          | 214567_s_at  |
| XCL1                        | Chemokine (C motif) ligand 1                           | 17            | lymphocyte chemotaxis                                                                                                                                          | 206366_x_at  |
| IFNG                        | gamma interferon                                       | 14.1          | immune defense                                                                                                                                                 | 210354_at    |

| Gene Symbol    | Gene Name                                                | Fold increase | Description/Function(s)                                                          | Probe set ID |
|----------------|----------------------------------------------------------|---------------|----------------------------------------------------------------------------------|--------------|
| CCL4           | Chemokine (C-C motif) ligand 4                           | 5             | chemotaxis                                                                       | 204103_at    |
| GZMA           | Granzyme A                                               | 4             | target cell lysis in cell-mediated immune responses                              | 205488_at    |
| GZMB           | Granzyme B                                               | 3             | target cell lysis in cell-mediated immune responses                              | 210164_at    |
| RANTES, CCL5   | chemokine ligand 5                                       | 2.3           | chemoattractant for blood monocytes, memory T helper cells and eosinophils.      | 204655_at    |
|                |                                                          |               |                                                                                  |              |
|                | <b>Proto/Oncogenes</b>                                   |               |                                                                                  |              |
| GFI1           | growth factor independent 1                              | 2.8           | Proto-oncogene                                                                   | 206589_at    |
| ENC-1, PIG10   | ectodermal-neural cortex                                 | 2.7           | malignant transformation                                                         | 201340_s_at  |
| MAF            | musculoaponeurotic fibrosarcoma oncogene homolog (avian) | 2.5           | avian oncogene homolog, cell growth and/or maintenance                           | 209348_s_at  |
| FLI1, SIC-1    | Friend leukemia virus integration 1                      | 2.2           | may be involved in human sarcomas, leukemias, and lymphomas                      | 204236_at    |
|                |                                                          |               |                                                                                  |              |
|                | <b>Suppressor/Repressor</b>                              |               |                                                                                  |              |
| KLF12, AP-2REP | repressor of AP-2                                        | 2.8           | AP-2 is involved in embryonic development and malignant transformation           | 206965_at    |
| FKBP4          | T cell FK506-binding protein 4                           | 2.5           | immunosuppressant that blocks distinct steps in intracellular signaling pathways | 200895_s_at  |
| GAGE7          | G antigen 7                                              | 2.3           | anti-apoptotic gene that confers resistance to Fas/CD95/APO-1                    | 208235_x_at  |
| FEZ1           | Fasciculation and elongation protein zeta 1 (zygin I)    | 2.4           | tumor suppressor                                                                 | 203562_at    |
| SAP30          | Sin3A-associated protein, 30kDa                          | 2.3           | transcriptional repressor, responds to TGFbeta                                   | 204900_x_at  |
| CD152, CTLA4   | cytotoxic T-lymphocyte-associated protein 4              | 2.1           | soluble form of CTLA4                                                            | 221331_x_at  |
| DLEU2, LEU2    | deleted in lymphocytic leukemia, 2                       | 2.1           | candidate gene causing B-CLL and mantle-cell lymphoma                            | 215629_s_at  |
| ACTN4          | Actinin, alpha 4                                         | 2.1           | suppresses tumorigenicity of human neuroblastoma cells                           | 200601_at    |
| LAG3           | lymphocyte-activation gene 3                             | 2.0           | regulatory rule in Treg , suppressor in CD4 T-cells                              | 206486_at    |
|                |                                                          |               |                                                                                  |              |
|                | <b>Cell cycle/proliferation control</b>                  |               |                                                                                  |              |
| CSF1, MCSF     | colony stimulating factor 1                              | 3.6           | cell proliferation, growth factor                                                | 209716_at    |
| IEGF, PDGFD    | platelet derived growth factor D                         | 2.6           | growth factor                                                                    | 219304_s_at  |
| TBRG4, CPR2    | transforming growth factor beta regulator 4              | 2.2           | positive regulation of cell proliferation                                        | 220789_s_at  |
| BTG3           | BTG family, member 3                                     | 2.2           | negative regulation of cell proliferation                                        | 215425_at    |
| ISG20, HEM45   | interferon stimulated exonuclease gene 20kDa             | 2.2           | mediating Estrogen control of cellular proliferation and differentiation         | 204698_at    |
| MGC2463, STAG3 | stromal antigen 3                                        | 2.2           | chromosome segregation, meiosis                                                  | 219812_at    |
| CDC14          | cell division cycle 14                                   | 2.0           | controlling cell cycle events                                                    | 210742_at    |
|                |                                                          |               |                                                                                  |              |
|                | <b>Transcription factor</b>                              |               |                                                                                  |              |
| KLF6, COPEB    | Kruppel-like Factor 6                                    | 4.5           | increases iNOS and NO production                                                 | 208960_s_at  |
| FOXP1          | Forkhead box P1                                          | 2.6           | transcription regulation                                                         | 215221_at    |
| TOX            | thymus high mobility group box                           | 2.5           | transcription regulation                                                         | 204529_s_at  |
|                |                                                          |               |                                                                                  |              |
|                | <b>Metabolism</b>                                        |               |                                                                                  |              |
| SCD            | Stearoyl-CoA desaturase (delta-9-desaturase)             | 2.7           | production of monounsaturated fatty acids, oxidoreductase activity               | 200832_s_at  |
| CHST12         | carbohydrate (chondroitin 4) sulfotransferase 12         | 2.7           | carbohydrate metabolism                                                          | 218927_s_at  |
| LOC283970      | hypothetical protein LOC283970                           | 2.5           | carboxylic acid metabolism, lyase activity                                       | 221992_at    |
| ACYPE, ACYP1   | acylphosphatase 1, erythrocyte (common) type             | 2.2           | Glycolysis/Gluconeogenesis Pyruvate metabolism                                   | 205260_s_at  |
| HSD17B7        | Hydroxysteroid (17-beta) dehydrogenase 7                 | 2.1           | regulates the biologic potency of estrogens and androgens by                     | 220081_x_at  |

| Gene Symbol        | Gene Name                                                        | Fold increase | Description/Function(s)                                                                 | Probe set ID |
|--------------------|------------------------------------------------------------------|---------------|-----------------------------------------------------------------------------------------|--------------|
|                    |                                                                  |               | oxidoreducton                                                                           |              |
| B4GAL-T1           | UDP-Gal:betaGlcNAc beta 1,4-galactosyltransferase, polypeptide 1 | 2.1           | carbohydrate metabolism                                                                 | 201883_s_at  |
| TPST2              | Tyrosylprotein sulfotransferase 2                                | 2.1           | protein-tyrosine sulfotransferase activity                                              | 204079_at    |
| MRPS6              | Mitochondrial ribosomal protein S6                               | 2.0           | protein biosynthesis                                                                    | 212944_at    |
| CACYBP             | calcyclin binding protein                                        | 2.0           | ubiquitin cycle                                                                         | 210691_s_at  |
|                    |                                                                  |               |                                                                                         |              |
|                    | <b>Transporters</b>                                              |               |                                                                                         |              |
| SLCO4C1            | solute carrier organic anion transporter family, member 4C1      | 2.4           | organic anion transporter                                                               | 222071_s_at  |
| VDP                | vesicle docking protein P115                                     | 2.4           | protein transporter ER-Golgi activity                                                   | 201831_s_at  |
| C1orf24            | chromosome 1 open reading frame 24                               | 2.2           | transport, protein folding                                                              | 217966_s_at  |
| CLTC               | Clathrin, heavy polypeptide (Hc)                                 | 2.2           | intracellular protein transport                                                         | 220855_at    |
| VAMP4              | vesicle-associated membrane protein 4                            | 2.1           | vesicle-mediated transport                                                              | 211760_s_at  |
| STAU2              | staufen RNA binding protein, homolog 2                           | 2.0           | RNA transport                                                                           | 204226_at    |
|                    |                                                                  |               |                                                                                         |              |
|                    | <b>DNA binding proteins</b>                                      |               |                                                                                         |              |
| H2aa               | Histone H2A family                                               | 2.8           | nucleosome assembly and chromosome organization                                         | 214290_s_at  |
| H1.2               | H1 histone family, member 2                                      | 2.8           | chromosome organization                                                                 | 209398_at    |
| HIST2H2AA          | H2A histone family                                               | 2.3           | chromosome organization                                                                 | 218280_x_at  |
|                    |                                                                  |               |                                                                                         |              |
|                    | <b>Heat-shock proteins</b>                                       |               |                                                                                         |              |
| HSPA6              | heat shock 70kDa protein 6 (HSP70B')                             | 10.6          | protein folding                                                                         | 117_at       |
| HSPB1              | heat shock 27kDa protein 1                                       | 8.1           | regulation of translational initiation, protein folding, anti-apoptosis                 | 201841_s_at  |
| DNAJB4             | DnaJ (Hsp40) homolog, subfamily B, member 4                      | 5.1           | protein folding                                                                         | 203810_at    |
| STIP1              | stress-induced-phosphoprotein 1                                  | 2.6           | response to stress                                                                      | 213330_s_at  |
| HSPH1              | heat shock 105kDa/110kDa protein 1                               | 2.5           | protein folding                                                                         | 208744_x_at  |
| HSPE1              | heat shock 10kDa protein 1                                       | 2.4           | protein folding, caspase activation                                                     | 205133_s_at  |
| HSPD1              | heat shock 60kDa protein 1                                       | 2.4           | protein import into mitochondrial matrix, protein folding                               | 200806_s_at  |
| DNAJB1             | DnaJ (Hsp40) homolog, subfamily B, member 1                      | 2.2           | protein folding                                                                         | 200666_s_at  |
| HSP90AA1           | heat shock protein 90kDa alpha (cytosolic), class A member 1     | 2.1           | positive regulation of nitric oxide biosynthesis, protein folding                       | 211969_at    |
|                    |                                                                  |               |                                                                                         |              |
|                    | <b>Others</b>                                                    |               |                                                                                         |              |
| VCAM-1             | vascular cell adhesion molecule 1                                | 3.6           | cell adhesion molecules                                                                 | 203868_s_at  |
| DOCK9              | dedicator of cytokinesis 9                                       | 2.8           | GTPase binding                                                                          | 215626_at    |
| SNX9               | sorting nexin 9                                                  | 2.6           | intracellular signaling cascade                                                         | 215284_at    |
| APOBEC3G, APOBEC3F | apolipoprotein B mRNA editing enzyme                             | 2.6           | innate immune response, negative regulation of retroviral genome replication            | 214995_s_at  |
| EZH2               | enhancer of zeste homolog 2(Drosophila)                          | 2.4           | establishment and/or maintenance of chromatin architecture, regulation of transcription | 215006_at    |
| TRA2A              | Transformer-2 alpha                                              | 2.3           | pre-mRNA splicing factor activity                                                       | 213593_s_at  |
| SFRS11             | splicing factor, arginine/serine-rich 11                         | 2.3           | pre-mRNA splicing factor activity                                                       | 213742_at    |
| PYHIN1             | pyrin and HIN domain family, member 1                            | 2.3           | monocyte differentiation                                                                | 216748_at    |
| TRIM14             | tripartite motif-containing 14                                   | 2.2           | compartment specification                                                               | 203148_s_at  |
| GVIN1              | GTPase very large interferon inducible 1                         | 2.2           | soluble, cytosolic and nuclear protein. no record of function                           | 220577_at    |
| PPIA               | Peptidylprolyl isomerase A (cyclophilin A)                       | 2.2           | Protein folding                                                                         | 217136_at    |

| Gene Symbol  | Gene Name                                  | Fold increase | Description/Function(s)                                                                                                      | Probe set ID |
|--------------|--------------------------------------------|---------------|------------------------------------------------------------------------------------------------------------------------------|--------------|
| HCE, HCE1    | RNA guanylyltransferase and 5'-phosphatase | 2.2           | mRNA capping                                                                                                                 | 204208_at    |
| ANX6         | annexin A6                                 | 2.2           | vesicle fusion during exocytosis                                                                                             | 200982_s_at  |
| FMOD         | fibromodulin                               | 2.1           | An extracellular matrix glycoprotein which is overexpressed in B cells of B-CLL. It might be involved in pathology of B-CLL. | 202709_at    |
| DDX58        | DEAD (Asp-Glu-Ala-Asp) box polypeptide 58  | 2.1           | innate immune response, helicase activity                                                                                    | 218943_s_at  |
| MRP-S31      | mitochondrial ribosomal protein S31        | 2.1           | structural constituent of ribosome                                                                                           | 212604_at    |
| TBCE         | tubulin-specific chaperone e               | 2.1           | protein folding                                                                                                              | 203714_s_at  |
| SF1          | splicing factor 1                          | 2.1           | mRNA splicing                                                                                                                | 210172_at    |
| CHPPR        | mitochondrial fission regulator 1          | 2.1           | promote mitochondrial fission, secreted by chondrocytes                                                                      | 203208_s_at  |
|              |                                            |               |                                                                                                                              |              |
|              | <b>Unknown function</b>                    |               |                                                                                                                              |              |
| PMAIP1       | PMA-induced protein 1                      | 2.3           | protein binding, function unknown                                                                                            | 204285_s_at  |
| MGC2463      | stromal antigen 3                          | 2.2           | hypothetical protein                                                                                                         | 219812_at    |
| GSDMDC1      | gasdermin domain containing 1              | 2.3           | function unknown                                                                                                             | 218154_at    |
| BTN3A2       | butyrophilin, subfamily 3, member A2       | 2.8           | membrane-bound Ig-like protein, function unknown                                                                             | 209846_s_at  |
| BTN3A3       | butyrophilin, subfamily 3, member A3       | 2.1           | membrane-bound Ig-like protein, function unknown                                                                             | 204821_at    |
| BTN3A1, BTF5 | butyrophilin, subfamily 3, member A1       | 2.0           | membrane-bound Ig-like protein. function unknown                                                                             | 207485_x_at  |

**Table S2**

List of genes specifically downregulated in T cells of patients with CLL (n=249)

| Gene Symbol      | Gene Name                                                     | Fold decrease | Description/Function(s)                                                                                                                                                                                                                                                                    | Probe set ID |
|------------------|---------------------------------------------------------------|---------------|--------------------------------------------------------------------------------------------------------------------------------------------------------------------------------------------------------------------------------------------------------------------------------------------|--------------|
|                  | <b>Receptors</b>                                              |               |                                                                                                                                                                                                                                                                                            |              |
| CD87, PLAUR      | plasminogen activator urokinase receptor                      | 0.12          | chemotaxis, significantly diminished in diffuse type gastric carcinoma                                                                                                                                                                                                                     | 211924_s_at  |
| CLEC7A, CLECSF12 | C-type lectin superfamily member 12                           | 0.13          | MHC protein binding, phagocytosis, cell recognition, carbohydrate mediated signaling, <b>T-cell activation</b> , defense response to pathogenic protozoa                                                                                                                                   | 221698_s_at  |
| DCIR, CLECSF6    | C-type lectin superfamily member 6                            | 0.28          | May play a role in modulating DC differentiation and/or maturation. May be involved via its ITIM motif in the inhibition of B-cell-receptor-mediated calcium mobilization and protein tyrosine phosphorylation.                                                                            | 219947_at    |
| CD1d             | CD1d antigen                                                  | 0.14          | CD1d (MHCI-like) expressed on APCs, recognized by CD1d-restricted NKT cells                                                                                                                                                                                                                | 205789_at    |
| CCR1             | chemokine (C-C motif) receptor 1                              | 0.14          | chemotaxis, inflammatory response, immune response, cell adhesion, G-protein signaling, cell-cell signaling. One of the RANTES receptor.                                                                                                                                                   | 205098_at    |
| TREM1            | triggering receptor expressed on myeloid cells 1              | 0.14          | Expressed in monocytes and neutrophils. Stimulates neutrophil and monocyte-mediated inflammatory responses. Triggers release of pro-inflammatory chemokines and cytokines, as well as increased surface expression of cell activation markers.                                             | 219434_at    |
| HBEGF            | heparin-binding EGF-like growth factor                        | 0.14          | positive regulation of cell proliferation, growth factor activity                                                                                                                                                                                                                          | 38037_at     |
| C5R1, CD88       | complement component 5 receptor 1                             | 0.16          | C5a receptor, activation of MAPK, chemotaxis, cellular defense response                                                                                                                                                                                                                    | 220088_at    |
| FCAR, CD89       | receptor for Fc fragment of IgA                               | 0.18          | binds to the Fc region of immunoglobulins alpha, induce cytokine production                                                                                                                                                                                                                | 207674_at    |
| FCGR2A, CD32     | receptor for Fc fragment of IgG, low affinity IIa             | 0.18          | low affinity receptor which binds to the Fc region of immunoglobulins gamma                                                                                                                                                                                                                | 203561_at    |
| TLR4             | Toll-like receptor 4                                          | 0.19          | cause expression of co-receptor, Cooperates with LY96 and CD14 to mediate the innate immune response                                                                                                                                                                                       | 221060_s_at  |
| TLR2             | Toll-like receptor 2                                          | 0.25          | cause expression of co-receptor, Cooperates with LY96 to mediate the innate immune response                                                                                                                                                                                                | 204924_at    |
| TLR1             | Toll-like receptor 1                                          | 0.37          | cause expression of co-receptor, participates in the innate immune response to microbial agents                                                                                                                                                                                            | 210176_at    |
| FPR, FMLP        | Formyl peptide receptor 1                                     | 0.19          | chemotaxis, NO mediated signal transduction                                                                                                                                                                                                                                                | 205119_s_at  |
| CSF1R, CD115     | Colony stimulating factor 1 receptor                          | 0.22          | receptor for CSF-1, protein tyrosine-kinase                                                                                                                                                                                                                                                | 203104_at    |
| LILRB7           | Leukocyte immunoglobulin-like receptor, subfamily B, member 7 | 0.22          | receptor activity(with TM and ITIM domains), function unknown                                                                                                                                                                                                                              | 215838_at    |
| LILRA2           | Leukocyte immunoglobulin-like receptor, subfamily A, member 2 | 0.23          | may act as receptor (with TM domain) for class I MHC antigens                                                                                                                                                                                                                              | 207857_at    |
| LILRB2           | Leukocyte immunoglobulin-like receptor, subfamily B, member 2 | 0.24          | receptor (with TM and ITIM domains) for class I MHC antigens, recognizes a broad spectrum of HLA-A, HLA-B, HLA-C and HLA-G alleles, involved in the down-regulation of the immune response and the development of tolerance, expressed on monocytes, B cells, DCs and natural killer cells | 207697_x_at  |
| LILRB6           | Leukocyte immunoglobulin-                                     | 0.35          | receptor activity (with TM and ITIM                                                                                                                                                                                                                                                        | 208594_x_at  |

| Gene Symbol          | Gene Name                                                                                | Fold decrease | Description/Function(s)                                                                                                                                                                                                                                                                                                                                                                                     | Probe set ID |
|----------------------|------------------------------------------------------------------------------------------|---------------|-------------------------------------------------------------------------------------------------------------------------------------------------------------------------------------------------------------------------------------------------------------------------------------------------------------------------------------------------------------------------------------------------------------|--------------|
|                      | like receptor, subfamily B, member 6                                                     |               | domains), function unknown                                                                                                                                                                                                                                                                                                                                                                                  |              |
| PILRA                | Paired immunoglobulin-like type 2 receptor alpha                                         | 0.25          | strongly expressed in peripheral blood-derived monocytes, granulocytes, and particularly dendritic cells, but not in lymphocytes.                                                                                                                                                                                                                                                                           | 219788_at    |
| CD302                | CD302 Ag                                                                                 | 0.25          | receptor activity, function unknown                                                                                                                                                                                                                                                                                                                                                                         | 203799_at    |
| PTGER3               | Prostaglandin E receptor 3 (subtype EP3)                                                 | 0.25          | receptor for PGE2, the activity of this receptor can couple to both the inhibition of adenylate cyclase mediated by G-I proteins, and to an elevation of intracellular calcium                                                                                                                                                                                                                              | 213933_at    |
| CD163, M130          | CD163 antigen                                                                            | 0.26          | scavenger receptor activity, copper ion binding, involved in myeloid specific gene expression including several alternatively spliced isoforms                                                                                                                                                                                                                                                              | 203645_s_at  |
| TYROBP, DAP12        | TYRO protein tyrosine kinase binding protein                                             | 0.27          | associates with membrane glycoproteins of the KIR family without an ITIM which results in cellular activation                                                                                                                                                                                                                                                                                               | 204122_at    |
| FCER1G               | Fc receptor of IgE                                                                       | 0.30          | IgE high affinity Fc receptor, gamma polypeptide, expressed in most cells                                                                                                                                                                                                                                                                                                                                   | 204232_at    |
| IL1R1, IL1RA         | Interleukin 1 receptor, type 1                                                           | 0.31          | Binding to the ligand leads to the activation of NFkB                                                                                                                                                                                                                                                                                                                                                       | 202948_at    |
| FPR2A, FPRH1         | Formyl peptide receptor-like 1                                                           | 0.31          | Expressed abundantly in the lung and neutrophils, also found in the spleen and testis                                                                                                                                                                                                                                                                                                                       | 210772_at    |
| EGF-like module EMR2 | Egf-like module containing, mucin-like, hormone receptor-like sequence 2 (CD312 antigen) | 0.32          | probably involved in cell attachment                                                                                                                                                                                                                                                                                                                                                                        |              |
| LYN                  | protein tyrosine kinase Lyn , v-yes-1 Yamaguchi sarcoma viral related oncogene homolog   | 0.32          | physically linked to AMPA receptor and activated following stimulation of the receptor, then activating the MAP Kinase pathway, highly expressed in the central nervous system                                                                                                                                                                                                                              | 202625_at    |
| C1QR1                | complement component 1, q subcomponent, receptor 1                                       | 0.32          | Receptor for C1q, mannose-binding lectin (MBL2) and pulmonary surfactant protein A (SPA). May mediate the enhancement of phagocytosis in monocytes and macrophages upon interaction with soluble defense collagens.                                                                                                                                                                                         | 202878_s_at  |
| GEM                  | GTP-binding protein overexpressed in skeletal muscle                                     | 0.32          | possibly participating in receptor-mediated signal transduction at the plasma membrane                                                                                                                                                                                                                                                                                                                      | 204472_at    |
| CCRL2, CKRX          | Chemokine (C-C motif) receptor-like 2                                                    | 0.32          | G-protein coupled receptor, chemotaxis                                                                                                                                                                                                                                                                                                                                                                      | 211434_s_at  |
| IL13RA1              | Interleukin 13 receptor, alpha 1                                                         | 0.34          | binds IL13 with a low affinity                                                                                                                                                                                                                                                                                                                                                                              | 201887_at    |
| APLP2                | Amyloid beta (A4) precursor-like protein 2                                               | 0.34          | G-protein coupled receptor protein signaling pathway, may play a role in the regulation of hemostasis.                                                                                                                                                                                                                                                                                                      | 208702_x_at  |
| OLR1                 | Oxidised low density lipoprotein (oxLDL) (lectin-like) receptor 1                        | 0.35          | Its association with oxLDL induces the activation of NFkB through an increased production of intracellular reactive oxygen and a variety of pro- atherogenic cellular responses including a reduction of NO release, monocyte adhesion and apoptosis. In addition to binding oxLDL, it acts as a receptor for the HSP70 protein involved in antigen cross-presentation to naive T-cells in dendritic cells. | 210004_at    |
| PTPRE                | protein tyrosine phosphatase, receptor type, E                                           | 0.38          | protein tyrosine phosphatase activity                                                                                                                                                                                                                                                                                                                                                                       | 221840_at    |
| CSF2RB               | colony stimulating factor 2 receptor, beta                                               | 0.39          | High affinity receptor for IL-3, IL-5 and GM-CSF                                                                                                                                                                                                                                                                                                                                                            | 205159_at    |
| NGFRAP1, NADE        | nerve growth factor receptor (TNFRSF16) associated protein 1                             | 0.41          | may involve in mediated apoptosis induced by NGF                                                                                                                                                                                                                                                                                                                                                            | 217963_s_at  |

| Gene Symbol     | Gene Name                                                                 | Fold decrease | Description/Function(s)                                                                                                                                                                 | Probe set ID |
|-----------------|---------------------------------------------------------------------------|---------------|-----------------------------------------------------------------------------------------------------------------------------------------------------------------------------------------|--------------|
| TNFRSF1A, TNFR1 | tumor necrosis factor receptor superfamily, member 1A                     | 0.43          | Receptor for TNF-alpha and lymphotoxin-alpha which can trigger apoptosis. TNFR1 activates at least two distinct signaling cascades, apoptosis and NFkB signaling.                       | 207643_s_at  |
| IFNGR2, IFNGT1  | interferon gamma receptor 2 (interferon gamma transducer 1)               | 0.44          | part of the receptor for IFN-gamma                                                                                                                                                      | 201642_at    |
| SORT1           | sortilin 1                                                                | 0.44          | receptor activity, protein transporter activity, G-protein coupled                                                                                                                      | 212807_s_at  |
| IFNGR1          | interferon gamma receptor 1                                               | 0.48          | an integral part of the IFN-gamma receptor                                                                                                                                              | 211676_s_at  |
| RXRA            | Retinoid X receptor alpha                                                 | 0.48          | Nuclear hormone receptor. Involved in the retinoic acid response pathway. ARF6 acts as a key regulator of the tissue-specific adipocyte P2 (aP2) enhancer (By similarity)               | 202426_s_at  |
| GRINA           | glutamate receptor, ionotropic, N-methyl D-aspartate-associated protein 1 | 0.48          | glutamate receptor                                                                                                                                                                      | 212090_at    |
| RARA            | retinoic acid receptor, alpha                                             | 0.49          | steroid hormone receptor, transcription factor activity                                                                                                                                 | 203749_s_at  |
| JMJD1C, TRIP8   | jumonji domain containing 1C                                              | 0.49          | thyroid hormone receptor binding, regulation of transcription                                                                                                                           | 221763_at    |
| JMJD3           | jumonji domain containing 3                                               | 0.49          | function unknown                                                                                                                                                                        | 213146_at    |
|                 |                                                                           |               |                                                                                                                                                                                         |              |
|                 | <b>Signaling</b>                                                          |               |                                                                                                                                                                                         |              |
| JAG1, AGS       | Jagged 1 (Alagille syndrome)                                              | 0.12          | Angiogenesis, cell communication, Notch signaling pathway, hemopoiesis, regulation of cell migration and proliferation, myoblast and endothelial cell differentiation                   | 209099_x_at  |
| ADM             | Adrenomedullin                                                            | 0.19          | signal transduction, cell-cell signaling, cAMP biosynthesis, progesterone biosynthesis                                                                                                  | 202912_at    |
| CD86, B7-2      | CD28 Ag ligand 2                                                          | 0.22          | costimulatory signal essential for T lymphocyte proliferation and IL-2 production                                                                                                       | 205685_at    |
| OSM             | Oncostatin M                                                              | 0.25          | cell-cell signaling, immune response, development, negative regulation of proliferation                                                                                                 | 214637_at    |
| PLK2            | polo-like kinase 2 (Drosophila)                                           | 0.32          | protein serine/threonine kinase activity, signal transducer                                                                                                                             | 201939_at    |
| RAB31           | Ras-associated protein RAB31                                              | 0.33          | RAS oncogene family, small GTPase mediated signal transduction                                                                                                                          | 217762_s_at  |
| PTPNS1          | Protein tyrosine phosphatase, non-receptor type substrate 1               | 0.34          | membrane protein, Involved in the negative regulation of receptor tyrosine kinase-coupled cellular responses induced by cell adhesion, growth factors or insulin                        | 202897_at    |
| HCK, JTK9       | hemopoietic cell kinase                                                   | 0.35          | protein-tyrosine kinase activity                                                                                                                                                        | 208018_s_at  |
| PECAM1,CD31     | platelet/endothelial cell adhesion molecule                               | 0.35          | cell motility, signal transduction                                                                                                                                                      | 208981_at    |
| HMOX1, HO-1     | Heme oxygenase (decycling) 1                                              | 0.35          | heme oxygenase activity, signal transducer activity                                                                                                                                     | 203665_at    |
| IRS2            | Insulin receptor substrate 2                                              | 0.36          | signal transduction, glucose metabolism                                                                                                                                                 | 209185_s_at  |
| NRGN            | Neurogranin                                                               | 0.37          | protein kinase C substrate, RC3                                                                                                                                                         | 204081_at    |
| BASP1           | Brain abundant, membrane attached signal protein 1                        | 0.37          | Associated with the membranes of "growth cones" that form the tips of elongating axons, expressed in various tissue at nerve endings, also expressed in testis, kidney, lymphoid organs | 202391_at    |
| PRKAR2B         | Protein kinase, cAMP-dependent regulatory type II beta                    | 0.38          | intracellular signaling cascade                                                                                                                                                         | 203680_at    |
| CTNNB1          | Catenin beta 1                                                            | 0.40          | TGF-Beta Signaling Pathway                                                                                                                                                              | 201533_at    |
| PBEF1           | pre-B-cell colony enhancing factor 1                                      | 0.40          | cell-cell signaling, positive regulation of cell proliferation                                                                                                                          | 217738_at    |
| SOCS1           | suppressor of cytokine                                                    | 0.40          | intracellular signaling cascade, regulation                                                                                                                                             | 209999_x_at  |

| Gene Symbol   | Gene Name                                                                  | Fold decrease | Description/Function(s)                                                                                                                                                                                                                                                                  | Probe set ID |
|---------------|----------------------------------------------------------------------------|---------------|------------------------------------------------------------------------------------------------------------------------------------------------------------------------------------------------------------------------------------------------------------------------------------------|--------------|
|               | signaling 1                                                                |               | of cell growth, ubiquitin cycle, negative regulation of JAK-STAT cascade, protein kinase inhibitor activity, insulin-like growth factor receptor binding                                                                                                                                 |              |
| SOCS2, CIS2   | suppressor of cytokine signaling 2                                         | 0.45          | regulation of cell growth, anti-apoptosis, JAK-STAT cascade, regulation of signal transduction, positive regulation of neuron differentiation                                                                                                                                            | 203373_at    |
| MPP1, PEMP    | Membrane protein, palmitoylated 1                                          | 0.41          | signal transduction, guanylate kinase activity                                                                                                                                                                                                                                           | 202974_at    |
| CHMP1B        | chromatin modifying protein 1B                                             | 0.42          | G-protein signaling                                                                                                                                                                                                                                                                      | 218177_at    |
| GNG11         | Guanine nucleotide binding protein 11                                      | 0.44          | G-protein coupled receptor protein signaling pathway                                                                                                                                                                                                                                     | 204115_at    |
| APP, AAA      | Amyloid beta (A4) precursor protein (protease nexin-II, Alzheimer disease) | 0.44          | signal transduction, copper ion homeostasis, apoptosis, cell adhesion                                                                                                                                                                                                                    | 200602_at    |
| LY96          | lymphocyte antigen 96                                                      | 0.44          | inflammatory response, cellular defense response, cell surface receptor linked signal transduction                                                                                                                                                                                       | 206584_at    |
| SPHK1         | Sphingosine kinase 1                                                       | 0.45          | protein kinase C activation, intracellular signaling cascade, sphingoid catabolism                                                                                                                                                                                                       | 219257_s_at  |
| RAB1A         | RAB1                                                                       | 0.46          | small GTPase mediated signal transduction, member of RAS oncogene family                                                                                                                                                                                                                 | 207791_s_at  |
| CORO1C        | Coronin actin-binding protein 1C                                           | 0.47          | Phagocytosis, signal transduction                                                                                                                                                                                                                                                        | 221676_s_at  |
| ZFYVE16       | zinc finger FYVE domain containing 16                                      | 0.48          | signal transduction, protein-lysosome targeting                                                                                                                                                                                                                                          | 203651_at    |
| SGK           | serum/glucocorticoid regulated kinase                                      | 0.48          | protein serine/threonine kinase activity                                                                                                                                                                                                                                                 | 201739_at    |
| RHOQ, TC10    | Ras homolog gene family, member Q                                          | 0.39          | small GTPase mediated signal transduction                                                                                                                                                                                                                                                | 212120_at    |
| NCF4, P40PHOX | Neutrophil cytosolic factor 4 (40kD)                                       | 0.49          | intracellular signaling cascade, electron transport                                                                                                                                                                                                                                      | 207677_s_at  |
| ZYX           | Zyxin                                                                      | 0.50          | signal transduction, cell-cell signaling, cell adhesion                                                                                                                                                                                                                                  | 200808_s_at  |
|               | <b>Transcription factors</b>                                               |               |                                                                                                                                                                                                                                                                                          |              |
| MAFB, KRML    | V-maf musculoaponeurotic fibrosarcoma oncogene homolog B (avian)           | 0.13          | transcription factor                                                                                                                                                                                                                                                                     | 218559_s_at  |
| SPI1, PU.1    | Spleen focus forming virus (SFFV) proviral integration oncogene spi1       | 0.17          | transcription factor essential for the development of myeloid and B-lymphoid cells. Unlike complete or 50% loss, <b>80% loss</b> of PU.1 induced a precancerous state characterized by accumulation of an abnormal precursor pool retaining responsiveness to colony-stimulating factor. | 205312_at    |
| FOSL1         | FOS-like antigen 1                                                         | 0.21          | transcription factor activity, cell proliferation                                                                                                                                                                                                                                        | 204420_at    |
| KLF4          | Kruppel-like factor 4                                                      | 0.24          | negative regulation of transcription, mesoderm cell fate determination, negative regulation of cell proliferation                                                                                                                                                                        | 221841_s_at  |
| SOX4          | SRY (sex determining region Y)-box 4                                       | 0.29          | Transcriptional activator that binds with high affinity to the T-cell enhancer motif 5'-AACAAAG-3'                                                                                                                                                                                       | 201417_at    |
| CEBPD         | CCAAT/enhancer binding protein (C/EBP) delta                               | 0.29          | transcriptional activator in the regulation of genes involved in immune and inflammatory responses                                                                                                                                                                                       | 213006_at    |
| CEBPB         | CCAAT/enhancer binding protein beta                                        | 0.46          | Specifically binds to an IL-1 response element in the IL-6 gene. CEBPB also binds to regulatory regions of several acute-phase and cytokines genes. It probably plays a role in the regulation of acute-phase reaction, inflammation and hemopoiesis.                                    | 212501_at    |



| Gene Symbol     | Gene Name                                                                      | Fold decrease | Description/Function(s)                                                                                                                                                                                 | Probe set ID |
|-----------------|--------------------------------------------------------------------------------|---------------|---------------------------------------------------------------------------------------------------------------------------------------------------------------------------------------------------------|--------------|
| EGR1, TIS8      | Early growth response 1                                                        | 0.33          | Activates the transcription of target genes whose products are required for mitogenesis and differentiation                                                                                             | 201694_s_at  |
| HHEX            | Hematopoietically expressed homeobox                                           | 0.36          | transcription factor                                                                                                                                                                                    | 215933_s_at  |
| EPAS1           | Endothelial PAS domain protein 1                                               | 0.37          | Transcription factor involved in the induction of oxygen regulated genes. Regulates the vascular endothelial growth factor (VEGF) expression. Potent activator of the Tie-2 tyrosine kinase expression. | 200878_at    |
| NRIP1           | Nuclear receptor interacting protein 1                                         | 0.40          | Modulates transcriptional activation by steroid receptors such as NR3C1, NR3C2 and ESR1.                                                                                                                | 202599_s_at  |
| BACH1           | BTB and CNC homology 1, basic leucine zipper transcription factor 1            | 0.41          | Play important roles in coordinating transcription activation and repression by MAFK                                                                                                                    | 204194_at    |
| BACH2           | BTB and CNC homology 1, basic leucine zipper transcription factor 2            | 0.48          | Play important roles in coordinating transcription activation and repression by MAFK (By similarity)                                                                                                    | 221234_s_at  |
| CRK             | V-crk avian sarcoma virus CT10 oncogene homolog                                | 0.41          | Involved in phagocytosis of apoptotic cells and cell motility via its interaction with DOCK1 and DOCK4                                                                                                  | 202226_s_at  |
| ETS2            | V-ets avian erythroblastosis virus E26 oncogene homolog 2                      | 0.44          | activating stromelysin-1 (MMP3) and collagenase 1 (MMP8) promoters, required to maintain the transformed state of human prostate cancer cells                                                           | 201329_s_at  |
| ZBTB1           | zinc finger and BTB domain containing 1                                        | 0.45          | May be involved in transcriptional regulation                                                                                                                                                           | 205092_x_at  |
| SCML1           | Sex comb on midleg (Drosophila)-like 1                                         | 0.45          | involved in transcriptional repression of HOX genes                                                                                                                                                     | 218793_s_at  |
| ZNF557          | zinc finger protein 557                                                        | 0.46          | May be involved in transcriptional regulation                                                                                                                                                           | 220444_at    |
| ZNF571          | zinc finger protein 571                                                        | 0.48          | May function as a transcription factor                                                                                                                                                                  | 206648_at    |
| RAI17           | Retinoic acid induced 17                                                       | 0.48          | Increases ligand-dependent transcriptional activity of Androgen Receptor and promotes Androgen Receptor sumoylation.                                                                                    | 212124_at    |
| LASS6           | LAG1 longevity assurance homolog 6 (S. cerevisiae)                             | 0.48          | May be involved in sphingolipid synthesis or its regulation (By similarity)                                                                                                                             | 212446_s_at  |
| ELL2            | elongation factor, RNA polymerase II, 2                                        | 0.49          | RNA polymerase II transcription factor activity                                                                                                                                                         | 214446_at    |
|                 |                                                                                |               |                                                                                                                                                                                                         |              |
|                 | <b>Cytokines/Chemokines</b>                                                    |               |                                                                                                                                                                                                         |              |
| CCL2, MCP1      | chemokine (C-C motif) ligand 2                                                 | 0.05          | Chemotactic factor that attracts monocytes and basophils                                                                                                                                                | 216598_s_at  |
| CCL7, MCP3      | chemokine (C-C motif) ligand 7                                                 | 0.12          | calcium ion homeostasis, chemotaxis, inflammatory response, cell-cell signaling, antimicrobial humoral response                                                                                         | 208075_s_at  |
| CXCL1, GRO1     | chemokine (C-X-C motif) ligand 1 (melanoma growth stimulating activity, alpha) | 0.19          | chemotactic activity for neutrophils, may play a role in inflammation and exerts its effects on endothelial cells in an autocrine fashion                                                               | 204470_at    |
| CXCL2, GRO2     | chemokine (CXC motif) ligand 2, GRO2                                           | 0.22          | Hematoregulatory chemokine, which in vitro, suppresses hematopoietic progenitor cell proliferation                                                                                                      | 209774_x_at  |
| GRN             | Granulin                                                                       | 0.25          | cytokine activity, growth factor activity, cell-cell signaling, cell proliferation                                                                                                                      |              |
| TNFSF13 (APRIL) | tumor necrosis factor (ligand) superfamily, member 13                          | 0.27          | a proliferation-inducing ligand, a cytokine that binds to TNFRSF13B/TACI and TNFRSF17/BCMA, may be implicated in the regulation of tumor cell growth.                                                   | 210314_x_at  |
| IL8, CXCL8      | Interleukin 8                                                                  | 0.29          | IL-8 is a chemotactic factor that attracts neutrophils, basophils, and T-cells, but not monocytes. It is also involved in neutrophil activation.                                                        | 211506_s_at  |
| CXCL3           | chemokine (C-X-C motif) ligand 3                                               | 0.31          | chemotactic activity for neutrophils, may play a role in inflammation and exert its                                                                                                                     | 207850_at    |

| Gene Symbol       | Gene Name                                                                          | Fold decrease | Description/Function(s)                                                                                                                                                                                   | Probe set ID |
|-------------------|------------------------------------------------------------------------------------|---------------|-----------------------------------------------------------------------------------------------------------------------------------------------------------------------------------------------------------|--------------|
|                   |                                                                                    |               | effects on endothelial cells in an autocrine fashion                                                                                                                                                      |              |
| IL1B              | Interleukin 1, beta                                                                | 0.40          | regulation of cell cycle, apoptosis, negative regulation of cell proliferation                                                                                                                            | 205067_at    |
| LARC, CCL20       | Small inducible cytokine subfamily A (Cys-Cys), member 20                          | 0.42          | chemotactic factor that attracts lymphocytes and, slightly neutrophils                                                                                                                                    | 205476_at    |
| IL1RN, IL1RA      | interleukin 1 receptor antagonist                                                  | 0.44          | IL-1 antagonist                                                                                                                                                                                           | 212657_s_at  |
| PF4V1             | Platelet factor 4 variant 1                                                        | 0.44          | Inhibitor of angiogenesis. Inhibitor of endothelial cell chemotaxis                                                                                                                                       | 207815_at    |
|                   | <b>Cell cyle/Proliferation</b>                                                     |               |                                                                                                                                                                                                           |              |
| MKP3, PYST1       | dual specificity phosphatase 6                                                     | 0.12          | regulation of cell cycle, inactivation of MAPK, protein amino acid dephosphorylation, apoptosis                                                                                                           | 208891_at    |
| EMP1, TMP         | epithelial membrane protein 1                                                      | 0.12          | cell-cell interaction, control of proliferation, not found in leukocytes                                                                                                                                  | 201324_at    |
| DIF2, IEX1        | Immediate early response 3                                                         | 0.21          | anti-apoptosis, cell growth and/or maintenance, morphogenesis                                                                                                                                             | 201631_s_at  |
| DUSP6, MKP3       | Dual specificity phosphatase 6                                                     | 0.21          | regulation of cell cycle, inactivation of MAPK, protein dephosphorylation, apoptosis                                                                                                                      | 208892_s_at  |
| LST1              | leukocyte specific transcript 1                                                    | 0.29          | negative regulation of lymphocyte proliferation                                                                                                                                                           | 215633_x_at  |
| G0S2              | Putative lymphocyte G0/G1 switch gene                                              | 0.31          | Potential oncogene and regulator of latent HIV, regulation of progression through cell cycle                                                                                                              | 213524_s_at  |
| EVI5              | Ecotropic viral integration site 5                                                 | 0.38          | development, cell proliferation                                                                                                                                                                           | 209717_at    |
| RBBP6             | Retinoblastoma-binding protein 6                                                   | 0.42          | regulation of cell cycle                                                                                                                                                                                  | 212783_at    |
| BCL2A1, GRS       | BCL2-related protein A1                                                            | 0.45          | anti-apoptosis, regulation of apoptosis                                                                                                                                                                   | 205681_at    |
| RNF125            | ring finger protein 125                                                            | 0.46          | T-cell RING activation protein 1 (TRAC-1)                                                                                                                                                                 | 207735_at    |
| GADD45A           | Growth arrest and DNA-damage-inducible alpha                                       | 0.46          | regulation of cyclin                                                                                                                                                                                      | 203725_at    |
| CDKN1C            | Cyclin-dependent kinase inhibitor 1C                                               | 0.47          | cyclin-dependent protein kinase inhibitor activity, cell cycle arrest                                                                                                                                     | 213348_at    |
| CREG1             | Cellular repressor of E1A-stimulated genes                                         | 0.47          | Transcription regulation, regulation of cell growth                                                                                                                                                       | 201200_at    |
|                   |                                                                                    |               |                                                                                                                                                                                                           |              |
|                   | <b>Transporters</b>                                                                |               |                                                                                                                                                                                                           |              |
| SLC31A2, CTR2     | Solute carrier family 31 member 2                                                  | 0.24          | copper ion transporters                                                                                                                                                                                   | 204204_at    |
| SLC7A11           | Solute carrier family 7, (cationic amino acid transporter, y+ system) member 11    | 0.28          | cystine:glutamate antiporter activity                                                                                                                                                                     | 209921_at    |
| SLC25A37          | Solute carrier family 25, member 37 (MSCP)                                         | 0.34          | mitochondrial carrier family                                                                                                                                                                              | 221920_s_at  |
| SLC11A1           | Solute carrier family 11 (proton-coupled divalent metal ion transporters) member 1 | 0.38          | Divalent transition metal (iron and manganese) transporter involved in iron metabolism and host resistance to certain pathogens. Macrophage-specific membrane transport function.                         | 210423_s_at  |
| SLC22A4           | Solute carrier family 22, member 4 (OCTN1)                                         | 0.42          | organic cation transporter                                                                                                                                                                                | 205896_at    |
| SLCO4A1, SLC21A12 | Solute carrier organic anion transporter family, member 4A1                        | 0.44          | Mediates the Na(+)-independent transport of organic anions such as the thyroid hormones T3 (triiodo-L-thyronine), T4 (thyroxine) and rT3, and of estrone-3-sulfate and taurocholate. Transporter activity | 219911_s_at  |
| SLC7A7, LPI       | Solute carrier family 7, member 7                                                  | 0.49          | cationic amino acid transporter, y+ system                                                                                                                                                                | 204588_s_at  |
| KCTD12            | voltage-gated potassium channel activity                                           | 0.16          | voltage-gated potassium channel complex                                                                                                                                                                   | 212192_at    |

| Gene Symbol    | Gene Name                                                                     | Fold decrease | Description/Function(s)                                                                                                                                                                                                                                                 | Probe set ID |
|----------------|-------------------------------------------------------------------------------|---------------|-------------------------------------------------------------------------------------------------------------------------------------------------------------------------------------------------------------------------------------------------------------------------|--------------|
| ABCA1          | ATP-binding cassette, sub-family A (ABC1), member 1                           | 0.35          | anion transporter, key gatekeeper influencing intracellular cholesterol transport                                                                                                                                                                                       | 203505_at    |
| ATP2A2         | ATPase, Ca <sup>++</sup> transporting, cardiac muscle, slow twitch 2          | 0.42          | translocation of calcium from the cytosol to the sarcoplasmic reticulum lumen                                                                                                                                                                                           | 212361_s_at  |
| VPS37C         | vacuolar protein sorting 37C (yeast)                                          | 0.46          | function unknown                                                                                                                                                                                                                                                        | 219053_s_at  |
| PGD            | Phosphogluconate dehydrogenase                                                | 0.47          | electron transporter and oxidoreductase activity                                                                                                                                                                                                                        | 201118_at    |
|                | <b>Metabolism</b>                                                             |               |                                                                                                                                                                                                                                                                         |              |
| NCF2           | Neutrophil cytosolic factor 2 (chronic granulomatous disease, autosomal 2)    | 0.17          | superoxide metabolism, cellular defense response                                                                                                                                                                                                                        | 209949_at    |
| ANPEP, CD13    | Alanyl (membrane) aminopeptidase                                              | 0.19          | Glutathione metabolism, angiogenesis, cell differentiation, defects in this gene appear to be a cause of various types of <b>leukemia or lymphoma</b> . There are some reports about correlation between CD13 and CLL.                                                  | 202888_s_at  |
| ALDH2          | Aldehyde dehydrogenase 2 family                                               | 0.24          | mitochiorial oxidative pathway of alcohol metabolism                                                                                                                                                                                                                    | 201425_at    |
| TKT            | Transketolase (Wernicke-Korsakoff syndrome)                                   | 0.30          | Pentose-Phosphate-Pathway                                                                                                                                                                                                                                               | 208700_s_at  |
| LACS, FACL1    | acyl-CoA synthetase long-chain family member 1                                | 0.31          | lipid metabolism                                                                                                                                                                                                                                                        | 201963_at    |
| WARS           | Tryptophanyl-tRNA synthetase                                                  | 0.33          | protein metabolism                                                                                                                                                                                                                                                      | 200628_s_at  |
| SMPDL3A, ASM3A | sphingomyelin phosphodiesterase acid-like 3A                                  | 0.35          | carbohydrate metabolism                                                                                                                                                                                                                                                 | 213624_at    |
| VNN2           | Vanin 2                                                                       | 0.37          | nitrogen compound metabolism                                                                                                                                                                                                                                            | 205922_at    |
| PSAP, GLBA     | Prosaposin (variant Gaucher disease and variant metachromatic leukodystrophy) | 0.37          | lipid metabolism, activator of degradation of sphingolipids                                                                                                                                                                                                             | 200866_s_at  |
| ASAH1          | N-acylsphingosine amidohydrolase (acid ceramidase)                            | 0.37          | lipid metabolism, hydrolyzes the sphingolipid ceramide                                                                                                                                                                                                                  | 210980_s_at  |
| PLSCR1         | phospholipid scramblase 1                                                     | 0.38          | A protein mediating transbilayer movement of plasma membrane phospholipids.                                                                                                                                                                                             | 202446_s_at  |
| CA1            | Carbonic anhydrase I                                                          | 0.38          | one-carbon compound metabolism, Nitrogen metabolism                                                                                                                                                                                                                     | 205950_s_at  |
| ALOX5          | arachidonate 5-lipoxygenase                                                   | 0.39          | electron transport, inflammatory response, leukotriene biosynthesis                                                                                                                                                                                                     | 214366_s_at  |
| NP, PNP        | Nucleoside phosphorylase                                                      | 0.39          | nucleotide metabolism, PNP deficiency causes SCID disease in childhood                                                                                                                                                                                                  | 201695_s_at  |
| SULT1A1        | sulfotransferase family, cytosolic, 1A, phenol-preferring, member 1           | 0.40          | Lipid metabolism, catalyzes the sulfate conjugation of catecholamines, phenolic drugs and neurotransmitters. Mediates the metabolic activation of carcinogenic N-hydroxyarylamines to DNA binding products and could so participate as modulating factor of cancer risk | 215299_x_at  |
| PYGL           | phosphorylase, glycogen                                                       | 0.40          | glycogen metabolism                                                                                                                                                                                                                                                     | 202990_at    |
| GLUL, GLNS     | Glutamate-ammonia ligase (glutamine synthase)                                 | 0.41          | glutamate metabolism, regulation of neurotransmitter levels                                                                                                                                                                                                             | 200648_s_at  |
| NP-C2, HE1     | Niemann-Pick disease, type C2 gene                                            | 0.44          | lipid metabolism                                                                                                                                                                                                                                                        | 200701_at    |
| FBP1           | Fructose-1,6-bisphosphatase 1                                                 | 0.45          | fructose metabolism, neoglucogenesis, energy pathway                                                                                                                                                                                                                    | 209696_at    |
| GERP, TRIM8    | tripartite motif-containing 8                                                 | 0.45          | protein ubiquitination                                                                                                                                                                                                                                                  | 221012_s_at  |
| GSTO1          | glutathione S-transferase omega1                                              | 0.48          | glutathione-dependent thiol transferase and dehydroascorbate reductase activities                                                                                                                                                                                       | 201470_at    |
| RNF184, msl-2  | ring finger protein 184                                                       | 0.48          | protein ubiquitination                                                                                                                                                                                                                                                  | 218733_at    |
| PFKFB3, IPFK2  | 6-phosphofructo-2-kinase/fructose-2,6-bisphosphatase 3                        | 0.48          | synthesis and degradation of fructose 2,6-bisphosphate                                                                                                                                                                                                                  | 202464_s_at  |

| Gene Symbol    | Gene Name                                           | Fold decrease | Description/Function(s)                                                                                                                                                                                            | Probe set ID |
|----------------|-----------------------------------------------------|---------------|--------------------------------------------------------------------------------------------------------------------------------------------------------------------------------------------------------------------|--------------|
| TMEM23         | transmembrane protein 23                            | 0.48          | lipid metabolism, converting phosphatidylcholine (PC) and ceramide to sphingomyelin (SM) and diacylglycerol (DAG) and vice versa                                                                                   | 212989_at    |
| LTA4H          | Leukotriene A4 hydrolase                            | 0.49          | leukotriene biosynthesis, epoxide hydrolase, peptidase, metallopeptidase                                                                                                                                           | 208771_s_at  |
| RNMT           | RNA (guanine-7-) methyltransferase                  | 0.49          | mRNA capping                                                                                                                                                                                                       | 202684_s_at  |
| GM2A, SAP-3    | GM2 ganglioside activator                           | 0.50          | lipid metabolism, stimulates ganglioside GM2 degradation                                                                                                                                                           | 33646_g_at   |
| PISD, PSSC     | Phosphatidylserine decarboxylase                    | 0.50          | phospholipid biosynthesis                                                                                                                                                                                          | 202392_s_at  |
|                |                                                     |               |                                                                                                                                                                                                                    |              |
|                | <b>Adhesion molecules</b>                           |               |                                                                                                                                                                                                                    |              |
| FCNM, FCN1     | Ficolin (collagen/fibrinogen domain-containing) 1   | 0.17          | Phosphate transport, heterophilic cell adhesion, opsonization                                                                                                                                                      | 205237_at    |
| CSPG2          | chondroitin sulfate proteoglycan 2                  | 0.18          | heterophilic cell adhesion, development, cell recognition                                                                                                                                                          | 221731_x_at  |
| C1orf38, ICB-1 | chromosome 1 open reading frame 38                  | 0.22          | function unknown                                                                                                                                                                                                   | 207571_x_at  |
| TGFBI, CSD     | Transforming growth factor, beta-induced, 68kD      | 0.26          | cell adhesion, negative regulation of cell adhesion, visual perception, cell proliferation                                                                                                                         | 201506_at    |
|                |                                                     |               |                                                                                                                                                                                                                    |              |
|                | <b>Cytoskeletal</b>                                 |               |                                                                                                                                                                                                                    |              |
| TUBB-5         | Tubulin beta-5                                      | 0.22          | the major constituent of microtubules                                                                                                                                                                              | 209191_at    |
| BANK1          | B-cell scaffold protein with ankyrin repeats 1      | 0.24          | BANK regulates BCR-induced calcium mobilization by promoting tyrosine phosphorylation of IP3 receptor.                                                                                                             | 219667_s_at  |
| EPB41L3        | erythrocyte membrane protein band 4.1-like 3        | 0.28          | actin binding structural molecule                                                                                                                                                                                  | 212681_at    |
| TPM4           | Tropomyosin 4                                       | 0.44          | In non-muscle cells is implicated in stabilizing cytoskeleton actin filaments                                                                                                                                      | 209344_at    |
| CKAP4          | cytoskeleton-associated protein 4                   | 0.50          | membrane protein                                                                                                                                                                                                   | 200998_s_at  |
|                |                                                     |               |                                                                                                                                                                                                                    |              |
|                | <b>Growth factor</b>                                |               |                                                                                                                                                                                                                    |              |
| VEGFA          | Vascular endothelial growth factor                  | 0.39          | Induces endothelial cell proliferation, promotes cell migration, inhibits apoptosis, and induces permeabilization of blood vessels.                                                                                | 210512_s_at  |
| EREG           | Epiregulin                                          | 0.41          | as a mitogen it may stimulate cell proliferation and/or angiogenesis                                                                                                                                               | 205767_at    |
| ECGF1          | Endothelial cell growth factor 1 (platelet-derived) | 0.45          | growth promoting activity on endothelial cells, angiogenic activity in vivo and chemotactic activity on endothelial cells in vitro                                                                                 | 204858_s_at  |
|                |                                                     |               |                                                                                                                                                                                                                    |              |
|                | <b>Others</b>                                       |               |                                                                                                                                                                                                                    |              |
| CD14           | CD14 antigen                                        | 0.09          | Monocyte differentiation Ag                                                                                                                                                                                        | 201743_at    |
| PI             | protease inhibitor                                  | 0.13          | deficiency of this gene is associated with emphysema and liver disease                                                                                                                                             | 211429_s_at  |
| S100A12        | S100 calcium-binding protein A12 (calgranulin C)    | 0.15          | Family of S100 proteins comprises the largest group of calcium-binding proteins. Regulating enzyme activities, the dynamics of cytoskeleton constituents, cell growth and differentiation, and Ca(2+) homeostasis. | 205863_at    |
| MIF, NIF       | S100 calcium-binding protein A9 (calgranulin B)     | 0.21          | cell-cell signaling, inflammatory response                                                                                                                                                                         | 203535_at    |
| S100C, MLN70   | S100 calcium-binding protein A11 (calgizzarin)      | 0.30          | pro-inflammatory molecules                                                                                                                                                                                         | 200660_at    |
| S100A8         | S100 calcium-binding protein A8 (calgranulin A)     | 0.45          | pro-inflammatory molecules                                                                                                                                                                                         | 202917_s_at  |
| THRM, CD141    | Thrombomodulin                                      | 0.16          | blood coagulation                                                                                                                                                                                                  | 203887_s_at  |
| CYP1B1, CP1B   | Cytochrome P450, subfamily I                        | 0.16          | monooxygenase activity                                                                                                                                                                                             | 202437_s_at  |

| Gene Symbol    | Gene Name                                                                             | Fold decrease | Description/Function(s)                                                                                                       | Probe set ID |
|----------------|---------------------------------------------------------------------------------------|---------------|-------------------------------------------------------------------------------------------------------------------------------|--------------|
|                | (dioxin-inducible), polypeptide 1                                                     |               |                                                                                                                               |              |
| IFI30          | Interferon gamma-inducible protein 30                                                 | 0.19          | MHC class II-restricted antigen processing (enzyme)                                                                           | 201422_at    |
| CYP3           | Peptidylprolyl isomerase F (cyclophilin F)                                            | 0.21          | protein folding                                                                                                               | 201489_at    |
| TRIB1          | tribbles homolog 1 (Drosophila)                                                       | 0.22          | protein kinase activity, ATP binding, cell proliferation                                                                      | 202241_at    |
| CSPG2          | Chondroitin sulfate proteoglycan 2 (versican)                                         | 0.23          | development, cell recognition                                                                                                 | 204620_s_at  |
| CYBB, CGD      | Cytochrome b-245, beta polypeptide                                                    | 0.24          | Ferric_reduct;oxidoreductase activity, involved in chronic granulomatous disease                                              | 203923_s_at  |
| CST3           | Cystatin C                                                                            | 0.25          | cystatin;cysteine protease inhibitor activity, involved in amyloid angiopathy and cerebral hemorrhage                         | 201360_at    |
| SNCA           | synuclein alpha                                                                       | 0.27          | anti-apoptosis                                                                                                                | 204466_s_at  |
| BRAG           | B cell RAG-associated protein                                                         | 0.27          | B cell surface signaling receptor molecule                                                                                    | 203066_at    |
| CSTA, STFA     | Cystatin A (stefin A)                                                                 | 0.28          | intracellular cysteine protease inhibitor activity                                                                            | 204971_at    |
| IGHA1, IGH A2  | immunoglobulin heavy constant alpha 1 and 2                                           | 0.29          | MHC-I receptor                                                                                                                | 217022_s_at  |
| FLJ20273       | RNA binding protein                                                                   | 0.29          | RNA binding protein                                                                                                           | 218035_s_at  |
| DMXL2          | Dmx-like 2                                                                            | 0.29          | function unknown                                                                                                              | 212820_at    |
| CTSS           | Cathepsin S                                                                           | 0.29          | protease, specifically involved in MHCII-associated chain processing and peptide loading                                      | 202902_s_at  |
| CTSL           | Cathepsin L                                                                           | 0.30          | protease, important for Ag presentation & the overall degradation of proteins in lysosomes                                    | 202087_s_at  |
| CTSB           | Cathepsin B                                                                           | 0.35          | protease, participate in intracellular degradation and turnover of proteins, also implicated in tumor invasion and metastasis | 200838_at    |
| CTSZ           | Cathepsin Z                                                                           | 0.43          | protease, involved in normal intracellular degradation                                                                        | 210042_s_at  |
| LGALS3, GALIG  | Lectin galactoside-binding, soluble, 3 (galectin 3)                                   | 0.30          | regulating the homeostasis and functions of the immune cells                                                                  | 208949_s_at  |
| KYNU           | Kynureninase (L-kynurenine hydrolase)                                                 | 0.31          | Increased levels in several cerebral and systemic inflammatory conditions                                                     | 217388_s_at  |
| PHLDA1, TDAG51 | pleckstrin homology-like domain family A member 1                                     | 0.31          | seems to be involved in regulation of apoptosis, former name T-cell death-associated gene 51 protein                          | 217997_at    |
| PHLDA2         | pleckstrin homology-like domain, family A, member 2                                   | 0.40          | imprinting, apoptosis                                                                                                         | 209803_s_at  |
| RNF130, G1RZFP | ring finger protein 130                                                               | 0.31          | may have a role during the apoptosis of hematopoietic cells (By similarity)                                                   | 217865_at    |
| SNCA, PD1      | Synuclein, alpha                                                                      | 0.32          | anti-apoptosis, may be involved in the regulation of dopamine release and transport                                           | 207827_x_at  |
| CRISPLD2       | cysteine-rich secretory protein LCCL domain containing 2                              | 0.32          | function unknown                                                                                                              | 221541_at    |
| PTGS2, COX2    | prostaglandin-endoperoxide synthase 2                                                 | 0.34          | may be a major mediator of inflammation and/or a role for prostanoid signaling in activity-dependent plasticity               | 204748_at    |
| PTGS1, COX1    | prostaglandin-endoperoxide synthase 1 (prostaglandin G/H synthase and cyclooxygenase) | 0.50          | may play an important role in regulating or promoting cell proliferation in some normal and neoplastically transformed cells  | 205128_x_at  |
| SERPIN2, PAI2  | Serine (or cysteine) proteinase inhibitor, clade B (ovalbumin), member 2              | 0.34          | Inhibits urokinase-type plasminogen activator. Monocyte derived.                                                              | 204614_at    |
| IgJ            | immunoglobulin J polypeptide                                                          | 0.35          | linker protein for immunoglobulin alpha and mu polypeptides                                                                   | 212592_at    |
| HBD            | Hemoglobin, delta                                                                     | 0.36          | O <sub>2</sub> transporter                                                                                                    | 206834_at    |
| GPX1, GSHPX1   | Glutathione peroxidase 1                                                              | 0.36          | free radical detoxification                                                                                                   | 200736_s_at  |

| Gene Symbol     | Gene Name                                                                         | Fold decrease | Description/Function(s)                                                                                                                                                                         | Probe set ID |
|-----------------|-----------------------------------------------------------------------------------|---------------|-------------------------------------------------------------------------------------------------------------------------------------------------------------------------------------------------|--------------|
| GPX3            | glutathione peroxidase 3 (plasma)                                                 | 0.47          | protects cells and enzymes from oxidative damage                                                                                                                                                | 214091_s_at  |
| TIMP1, EPO      | Tissue inhibitor of metalloproteinase 1                                           | 0.38          | collagenase inhibitor, mediates erythropoiesis in vitro, development, positive regulation of cell proliferation, erythrocyte maturation                                                         | 201666_at    |
| IGLJ3           | Immunoglobulin lambda joining 3                                                   | 0.39          | part of Ig genes                                                                                                                                                                                | 214677_x_at  |
| SCO2            | SCO (cytochrome oxidase deficient, yeast) homolog 2                               | 0.40          | electron transport                                                                                                                                                                              | 205241_at    |
| SOD2            | superoxide dismutase 2 (mitochondrial)                                            | 0.41          | free radical detoxification                                                                                                                                                                     | 215223_s_at  |
| ABHD5, CGI58    | abhydrolase domain containing 5                                                   | 0.42          | aminopeptidase activity, proteolysis                                                                                                                                                            | 213805_at    |
| IGLC1           | immunoglobulin lambda constant 1                                                  | 0.42          | lambda light chain                                                                                                                                                                              | 215121_x_at  |
| RAB11FIP1       | RAB11 family interacting protein 1 (class I)                                      | 0.42          | Rab11 effector protein involved in the endosomal recycling process. Also involved in controlling <b>membrane trafficking</b> along the phagocytic pathway and in phagocytosis                   | 219681_s_at  |
| HBG2            | Hemoglobin gamma G                                                                | 0.43          | fetal hemoglobin                                                                                                                                                                                | 204419_x_at  |
| SNN             | Stannin                                                                           | 0.43          | Plays a role in the toxic effects of organotins                                                                                                                                                 | 218033_s_at  |
| LMO2, TTG2      | LIM domain only 2, T-cell translocation protein 2                                 | 0.43          | exists in nucleus and involved in association with LMO1 (and others) in the formation of multimeric DNA-binding complex for the generation of hematopoietic lineages and angiogenesis (in mice) | 204249_s_at  |
| SCPEP1, HSCP1   | serine carboxypeptidase 1                                                         | 0.44          | Proteolysis and peptidolysis. May be involved in vascular wall and kidney homeostasis (By similarity)                                                                                           | 218217_at    |
| F13A            | coagulation factor XIII, A1 polypeptide                                           | 0.45          | coagulation                                                                                                                                                                                     | 203305_at    |
| FGL2, T49, pT49 | Fibrinogen-like 2                                                                 | 0.45          | T-cell specific. May play a role in physiologic lymphocyte functions at mucosal sites                                                                                                           | 204834_at    |
| MMP25           | membrane matrix metalloproteinase 25                                              | 0.46          | proteolysis, exist in extracellular matrix, may activate progelatinase A                                                                                                                        | 207890_s_at  |
| APOBEC3A        | apolipoprotein B mRNA editing enzyme, catalytic polypeptide-like 3A, Phorbol-in-1 | 0.46          | molecular function unknown                                                                                                                                                                      | 210873_x_at  |
| APOBEC3B        | apolipoprotein B mRNA editing enzyme, catalytic polypeptide-like 3B               | 0.50          | Binds to apoB and AU-rich RNAs, molecular function unknown                                                                                                                                      | 206632_s_at  |
| QKI             | QKI protein                                                                       | 0.46          | quaking homolog, KH domain RNA binding (mouse)                                                                                                                                                  | 212636_at    |
| NAGA, GALB      | N-acetylgalactosaminidase, alpha-                                                 | 0.46          | lysosomal protein, Hydrolysis of terminal non-reducing N-acetyl- D-galactosamine residues in N-acetyl-alpha-D-galactosaminides                                                                  | 202944_at    |
| CD248, TEM1     | CD248 antigen, endosialin                                                         | 0.46          | may play a role in tumor angiogenesis, single-pass type I membrane protein, extracellular matrix complex                                                                                        | 219025_at    |
| PTX3            | pentaxin-related gene                                                             | 0.47          | regulation of innate resistance to pathogens, inflammatory reactions, induced by IL-1 $\beta$ and TNF- $\alpha$                                                                                 | 206157_at    |
| NRIP3           | nuclear receptor interacting protein 3                                            | 0.47          | molecular function unknown                                                                                                                                                                      | 219557_s_at  |
| NAT-1, AAC1     | N-acetyltransferase 1                                                             | 0.48          | detoxification of a plethora of hydrazine and arylamine drugs, widely expressed, involved in bladder carcinogenesis                                                                             | 214440_at    |
| RP2             | Retinitis pigmentosa 2 (X-linked recessive)                                       | 0.48          | beta-tubulin folding, visual perception                                                                                                                                                         | 205191_at    |
| PPP1R10         | Protein phosphatase 1,                                                            | 0.48          | Inhibitor of PPP1CA and PPP1CC                                                                                                                                                                  | 201703_s_at  |

| Gene Symbol | Gene Name                                    | Fold decrease | Description/Function(s)                                                                               | Probe set ID |
|-------------|----------------------------------------------|---------------|-------------------------------------------------------------------------------------------------------|--------------|
|             | regulatory subunit 10                        |               | phosphatase activities                                                                                |              |
| DNAJB6      | DnaJ (Hsp40) homolog, subfamily B, member 6  | 0.50          | heat shock protein                                                                                    | 209015_s_at  |
| FBN2        | Fibrillin 2                                  | 0.50          | morphogenesis, extracellular matrix Ca <sup>2+</sup> binding, early process of elastic fiber assembly | 203184_at    |
|             | <b>Unknown</b>                               |               |                                                                                                       |              |
| FLJ22662    | Hypothetical protein FLJ22662                | 0.24          | function unknown                                                                                      | 218454_at    |
| CEP76       | centrosomal protein 76kDa                    | 0.40          | function unknown                                                                                      | 52285_f_at   |
| FAM49A      | Family with sequence similarity 49, member A | 0.43          | function unknown                                                                                      | 209683_at    |
| C15orf39    | chromosome 15 open reading frame 39          | 0.45          | function unknown                                                                                      | 215087_at    |
| ROGDI       | rogdi homolog (Drosophila)                   | 0.45          | function unknown                                                                                      | 218394_at    |
| C18orf1     | Chromosome 18 open reading frame 1           | 0.46          | integral to membrane, function unknown                                                                | 207996_s_at  |
| MGC14376    | Hypothetical protein MGC14376                | 0.47          | function unknown                                                                                      | 214696_at    |
| ANKRD12     | ankyrin repeat domain 12                     | 0.49          | nucleous protein, function unknown                                                                    | 212286_at    |
